# Supplementary material
Source: publisher figshare collection journal article supplement (https://aacr.figshare.com/articles/dataset/_/22430350)
Supplement: Supplementary file 1 [file 39876682]

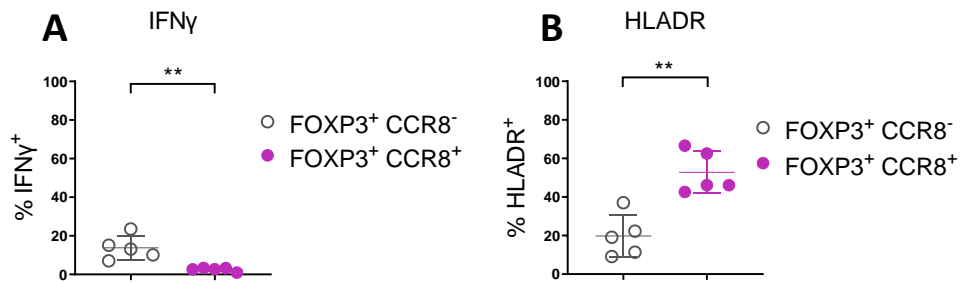

**Supplemental Figure 1: FOXP3<sup>+</sup> cells lacking CCR8 are composed of effector T cells and less activated T<sub>regs</sub>**  
 CD4<sup>+</sup>FOXP3<sup>+</sup> tumor infiltrating T cells from lung patients ( $n=5$ ) were divided into CCR8 positive and negative populations. (A) Intracellular IFN $\gamma$  was stained 4 hours post-treatment with PMA/Ionomycin. (B) Frequencies of HLADR<sup>+</sup> cells were measured without exogenous stimulation. \*\* $P < 0.01$ . Mann-Whitney test (two-tailed) (A-B).
